# Supplementary material for: Ultrafine Pt–Ni nanoparticles in hollow porous carbon spheres for remarkable oxygen reduction reaction catalysis
Source: Royal Society of Chemistry journal article supplement (doi:10.1039/d1dt00647a), 2021-01-01
Supplement: d1dt00647a1.pdf [file d1dt00647a1.pdf]

## Supporting Information

**Table S1. Pt and Ni loading estimated by XRF and elemental analysis of the samples**

| Samples                           | XRF     |         | Elemental analysis |        |       |
|-----------------------------------|---------|---------|--------------------|--------|-------|
|                                   | Pt /wt% | Ni /wt% | C /wt%             | N /wt% | N/C   |
| HPCS                              | 0.0     | 0.0     | 88.0               | 1.5    | 0.017 |
| PtNi <sub>0</sub> /HPCS           | 29.3    | 0.0     |                    |        |       |
| PtNi <sub>0.26</sub> /HPCS        | 25.5    | 1.9     |                    |        |       |
| PtNi <sub>0.41</sub> /HPCS        | 25.4    | 3.1     |                    |        |       |
| PtNi <sub>1.22</sub> /HPCS        | 25.5    | 9.4     | 49.2               | 2.3    | 0.047 |
| PtNi <sub>2.63</sub> /HPCS        | 28.2    | 22.4    |                    |        |       |
| Pt <sub>0</sub> Ni/HPCS           | 0.0     | 11.1    |                    |        |       |
| PtNi <sub>1.22</sub> /HPCS-no dpa | 27.9    | 10.2    | 52.6               | 1.0    | 0.019 |
| PtNi <sub>1.23</sub> /KB          | 26.3    | 9.7     |                    |        |       |

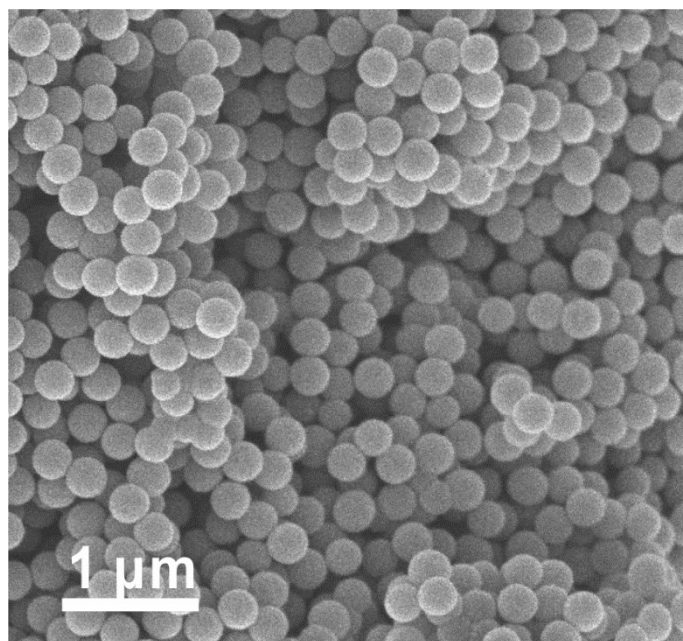

**Figure S1.** FESEM image of silica resorcinol-formaldehyde particles  $\text{SiO}_2@\text{SiO}_2/\text{RF}$ .

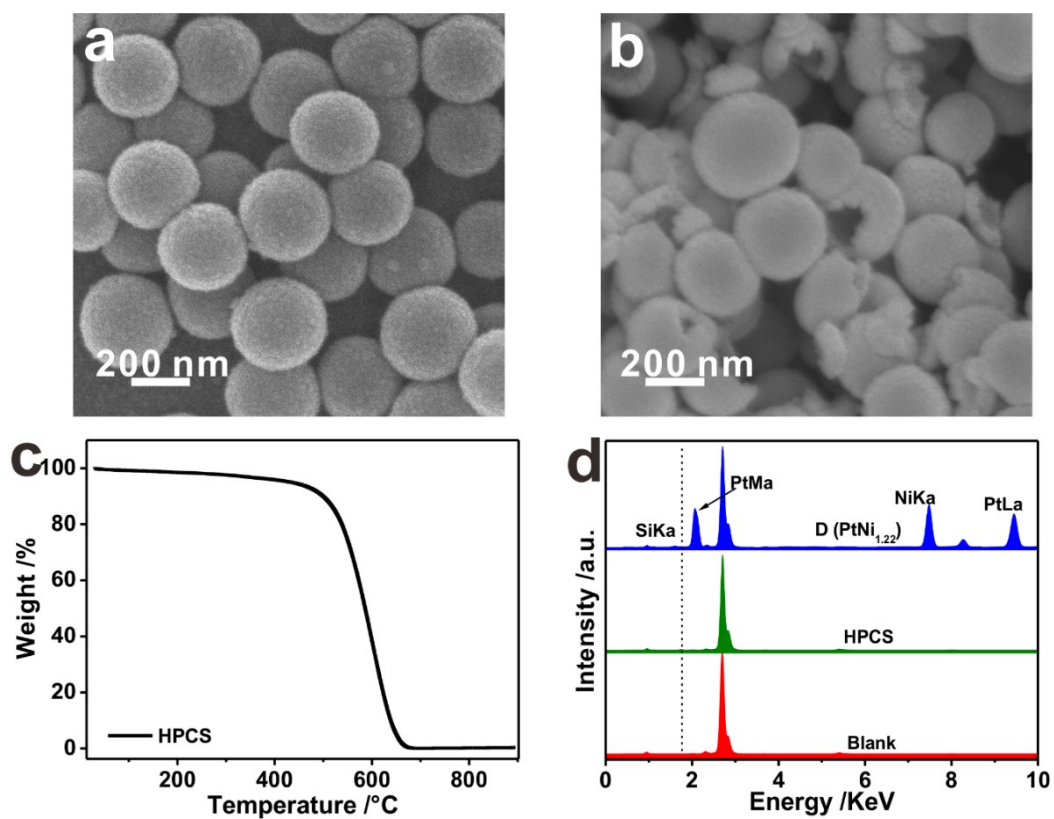

**Figure S2.** FESEM images of (a) HPCS and (b) HPCS broken by ultrasonication for 4 h after annealing at 973 K for 5 h under Ar. (c) TGA of HPCS in air. (d) XRF of  $\text{PtNi}_{1.22}/\text{HPCS}$  (blue), HPCS (green), and Blank (red).

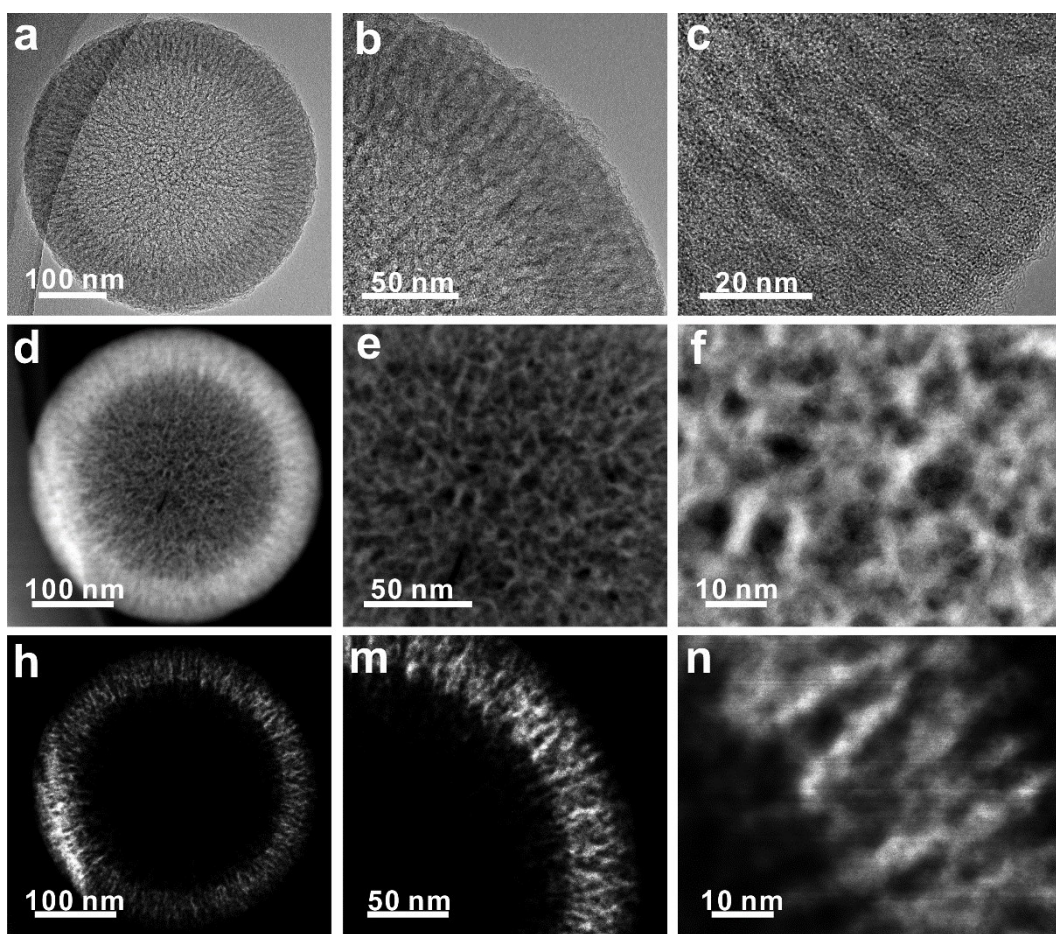

**Figure S3.** (a–c) TEM images and (d–n) HAADF-STEM images of HPCS.

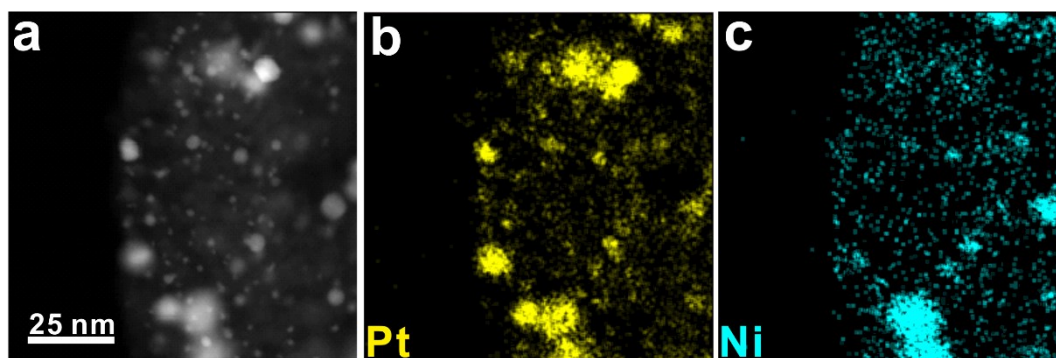

**Figure S4.** STEM-EDS mapping images of Pt and Ni of PtNi<sub>1.22</sub>/HPCS prepared without dpa (PtNi<sub>1.22</sub>/HPCS-no dpa).

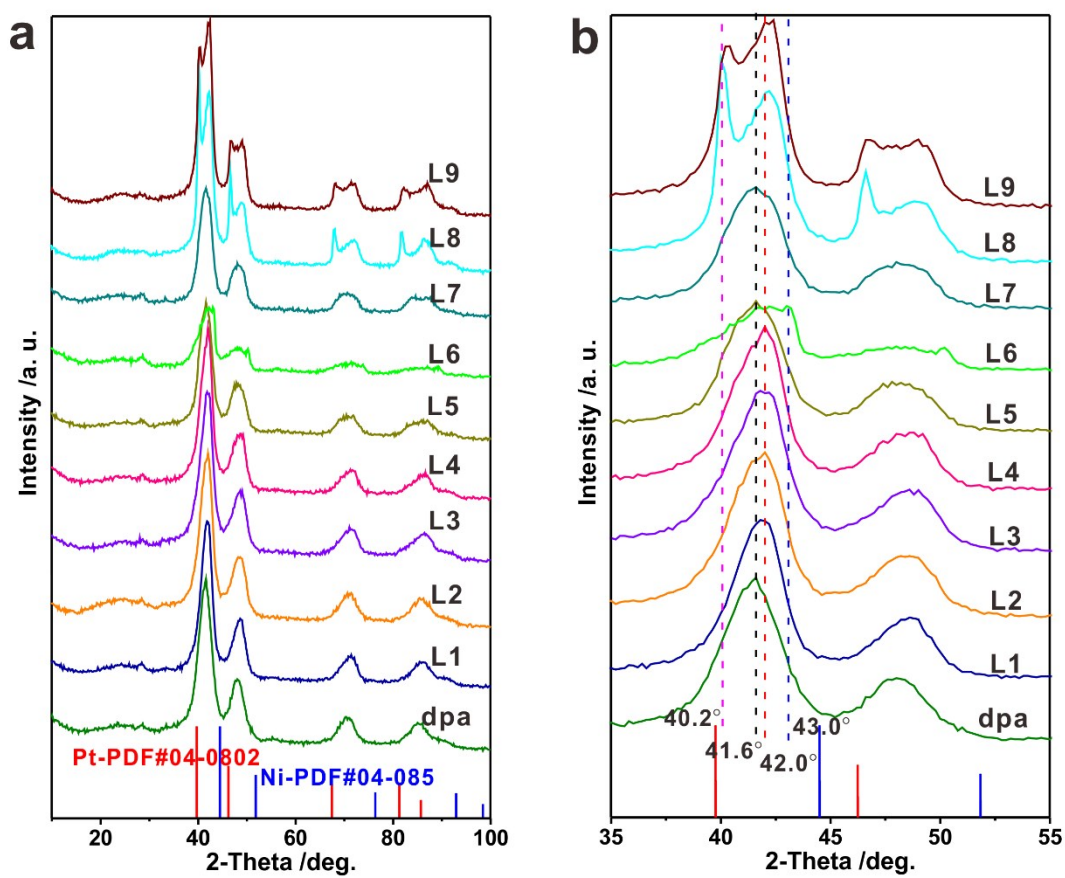

**Figure S5.** XRD of PtNi<sub>1.22</sub>/HPCS synthesized with different kinds of organic molecules. dpa: 2,2'-dipyridylamine; L1: aniline; L2: 2-aminopyridine; L3: 2,6-diaminopyridine; L4: pyridine; L5: diphenylamine; L6: 2,2'-dipicolylamine; L7: benzophenone; L8: benzaldehyde; L9: toluene.

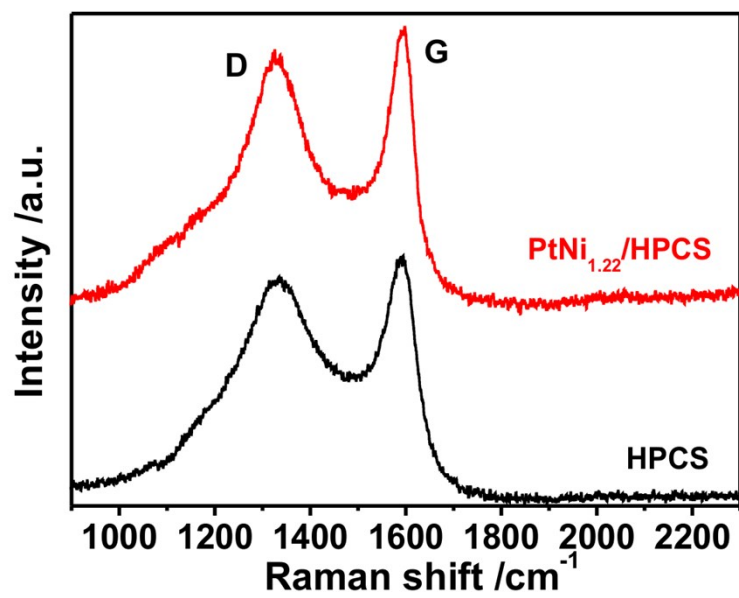

**Figure S6.** Raman spectra of HPCS and PtNi<sub>1.22</sub>/HPCS.



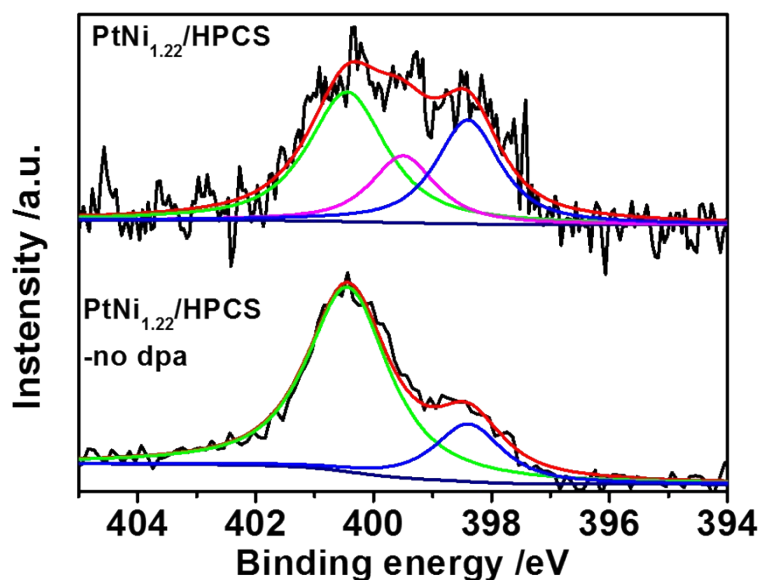

**Figure S7.** N 1s XPS spectra (black) of PtNi<sub>1.22</sub>/HPCS and PtNi<sub>1.22</sub>/HPCS-no dpa with peak fittings for pyridinic-N (398.4 eV, blue), amino-N (399.5 eV, violet), graphitic-N (400.5 eV, green), background (dark blue) and the fitting spectra (red). The peak positions of all peaks and FWHM of the peak at 399.5 eV (amino-N) were fixed in the fitting process, using an 80% Lorentzian-weighted Gaussian-Lorentzian sum function. A Shirley background was subtracted, and binding energies referenced to C 1s (284.6 eV). FWHM: (PtNi<sub>1.22</sub>/HPCS -no dpa) graphitic-N 1.64 eV, pyridinic-N 1.36 eV; (PtNi<sub>1.22</sub>/HPCS) graphitic-N 1.58 eV, amino-N 1.31 eV (fixed), pyridinic-N 1.3 eV.

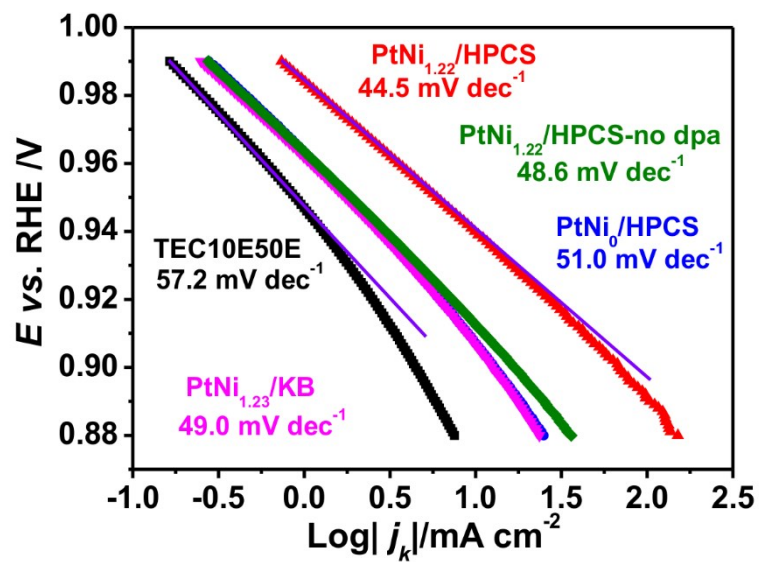

**Figure S8.** Tafel plots of catalysts PtNi<sub>0</sub>/HPCS, PtNi<sub>1.22</sub>/HPCS, PtNi<sub>1.22</sub>/HPCS-no dpa, PtNi<sub>1.23</sub>/KB, and TEC10E50E.



**Table S2. Comparison of ORR results of prepared catalysts with different kinds of organic molecules**

| Organic molecules                                                                                               | ECSA<br>/m <sup>2</sup> g <sup>-1</sup> <sub>Pt</sub> | MA<br>/A mg <sup>-1</sup> <sub>Pt</sub> | SA<br>/mA cm <sup>-2</sup> <sub>Pt</sub> |
|-----------------------------------------------------------------------------------------------------------------|-------------------------------------------------------|-----------------------------------------|------------------------------------------|
| 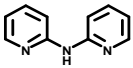<br>2,2'-Dipyridylamine (dpa)  | 105 ± 8                                               | 3.25 ± 0.14                             | 3.11 ± 0.09                              |
| <br>Aniline (L1)               | 81 ± 1                                                | 2.55 ± 0.42                             | 2.79 ± 0.42                              |
| <br>2-Aminopyridine (L2)       | 82 ± 1                                                | 2.53 ± 0.10                             | 3.10 ± 0.13                              |
| <br>2,6-Diaminopyridine (L3)   | 89 ± 3                                                | 3.14 ± 0.14                             | 3.54 ± 0.04                              |
| <br>Pyridine (L4)              | 80 ± 2                                                | 2.53 ± 0.27                             | 3.16 ± 0.44                              |
| <br>Diphenylamine (L5)       | 70 ± 1                                                | 1.74 ± 0.04                             | 2.48 ± 0.02                              |
| <br>2,2'-Dipicolylamine (L6) | 30 ± 3                                                | 0.66 ± 0.01                             | 2.25 ± 0.16                              |
| <br>Benzophenone (L7)        | 66 ± 1                                                | 1.74 ± 0.01                             | 2.62 ± 0.04                              |
| <br>Benzaldehyde (L8)        | 55 ± 1                                                | 1.86 ± 0.08                             | 3.42 ± 0.19                              |
| <br>Toluene (L9)             | 62 ± 2                                                | 2.01 ± 0.15                             | 3.24 ± 0.12                              |

ECSA, electrochemical surface area; MA, mass activity; SA, specific activity.

**Table S3.** Comparison of the ORR performance in recently published references.

| catalysts                                       | ECSA<br>(m <sup>2</sup> /g <sub>Pt</sub> ) | MA<br>(mA/μg <sub>Pt</sub> ) | SA<br>(mA/cm <sup>2</sup> <sub>Pt</sub> ) | Reference |
|-------------------------------------------------|--------------------------------------------|------------------------------|-------------------------------------------|-----------|
| Pt <sub>3</sub> Fe NW                           | 34.0                                       | 2.11                         | 4.34                                      | 1         |
| PtNi frame                                      | 73.4                                       | 1.51                         | 2.05                                      | 2         |
| PtNi frame                                      | 54.8                                       | 0.24                         | 0.44                                      | 3         |
| PtNiCo NW                                       | 82.2                                       | 4.2                          | 5.11                                      | 4         |
| Rh-Pt NW                                        | 86.4                                       | 1.41                         | 1.63                                      | 5         |
| PtNiPd NW                                       | 55.4                                       | 1.93                         | 3.48                                      | 6         |
| Pt <sub>3</sub> Co NW                           | 52.1                                       | 3.71                         | 7.12                                      | 7         |
| Jagged Pt NW                                    | 118                                        | 13.6                         | 11.5                                      | 8         |
| PtPb/Pt plate                                   | 55.1                                       | 4.3                          | 7.8                                       | 9         |
| Mo-Pt <sub>3</sub> Ni                           | 67.5                                       | 6.98                         | 10.3                                      | 10        |
| Pt Nanocage                                     | 38.2                                       | 0.75                         | 1.98                                      | 11        |
| PtNi thin film                                  | 9                                          | 0.216                        | 2.4                                       | 12        |
| Pt Nanotube                                     | 34.2                                       | 0.5                          | 1.48                                      | 13        |
| PtNi-NiB NP                                     | 59                                         | 5.3                          | 9.05                                      | 14        |
| Pt Nanocage                                     | 45.2                                       | 1.12                         | 2.48                                      | 15        |
| Pt <sub>73</sub> Ni <sub>27</sub> /C-Octahedral | 32                                         | 1.69                         | 5.29                                      | 16        |
| PtNi-BNCs                                       | 68.2                                       | 3.52                         | 5.16                                      | 17        |
| Pt/NHCS                                         | 193 ± 29                                   | 0.68 ± 0.14                  | 0.41 ± 0.06                               | 18        |
| Pt <sub>seed</sub> /Pt <sub>3</sub> NiMo/HGS    | 55                                         | 0.7                          | 1.23                                      | 19        |
| TEC10E50E                                       | 65.19 ± 3.64                               | 0.24 ± 0.00                  | 0.37 ± 0.03                               | This work |
| PtNi <sub>1.22</sub> /HPCS                      | 104.65 ± 7.81                              | 3.25 ± 0.14                  | 3.11 ± 0.09                               | This work |

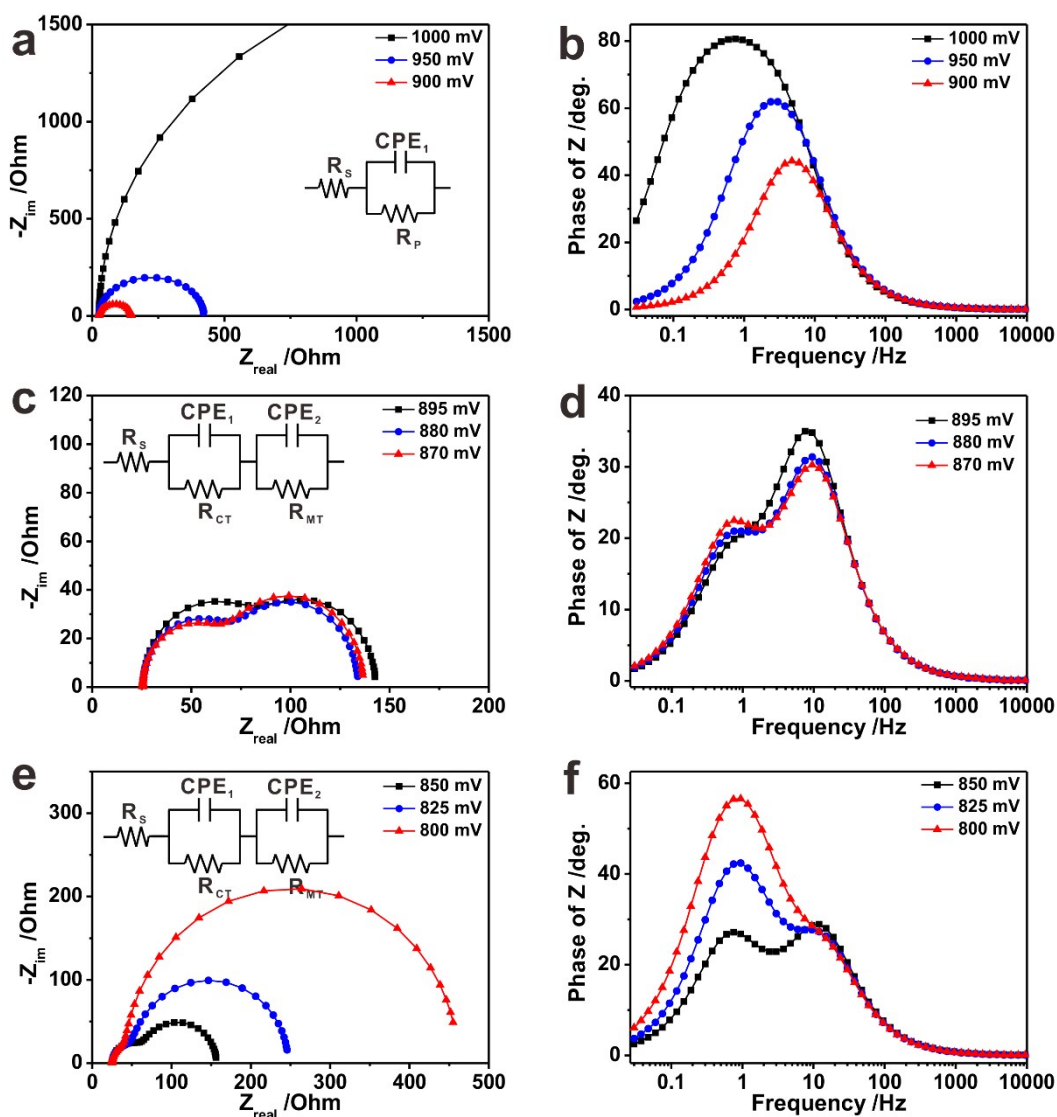

**Figure S9.** Nyquist plots and Bode phase plots of PtNi<sub>1.22</sub>/HPCS in the (a, b) kinetic region (1000–900 mV), (c, d) mixed-diffusion region (895–870 mV), and (e, f) mass-transport region (850–800 mV). Inset: equivalent electrical circuit used to model the EIS data, considering solution resistance ( $R_s$ ), polarization resistance ( $R_p$ ), two constant phase elements ( $CPE_1$  and  $CPE_2$ ), resistance related to mass transfer ( $R_{MT}$ ), and charge transfer resistance related to the ORR ( $R_{CT}$ ). The EIS measurements were performed in O<sub>2</sub>-saturated 0.1 M HClO<sub>4</sub> solution, over a frequency range of 0.03 Hz to 10 kHz, applying a 10 mV perturbation amplitude.

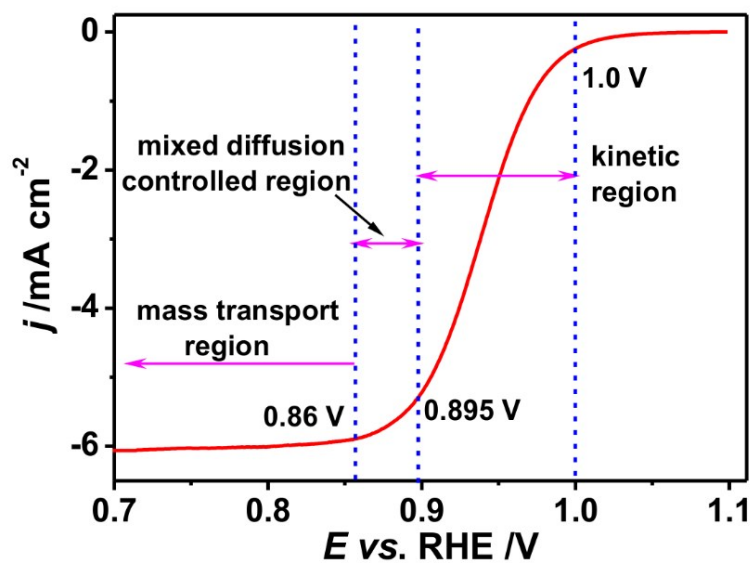

**Figure S10.** Anodic ORR polarization curves of PtNi<sub>1.22</sub>/HPCS recorded in O<sub>2</sub>-saturated 0.1 M HClO<sub>4</sub> solution with a sweep rate of 10 mV s<sup>-1</sup> and a rotation rate of 1600 rpm.

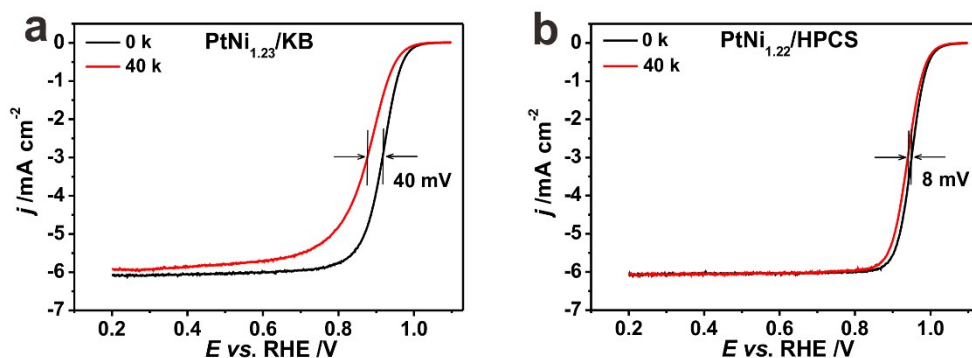

**Figure S11.** Durability of the catalysts to the ORR. LSV polarization curves of (a) PtNi<sub>1.23</sub>/KB and (b) PtNi<sub>1.22</sub>/HPCS after 0 and 40,000 ADT cycles. LSV recorded in O<sub>2</sub>-saturated 0.1 M HClO<sub>4</sub> solution at a sweep rate of 10 mV s<sup>-1</sup> and rotation speed of 1600 rpm (293 K). The ADT was conducted at 293 K by applying cyclic sweeps between 0.6 and 1.0 V<sub>RHE</sub> in O<sub>2</sub>-saturated 0.1 M HClO<sub>4</sub> electrolyte at a sweep rate of 100 mV s<sup>-1</sup>.

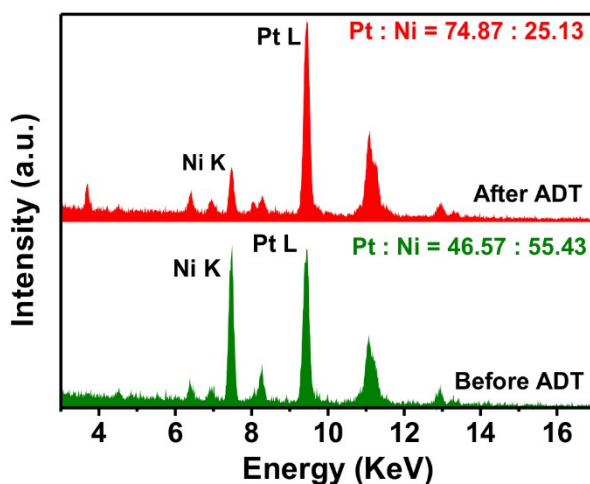

**Figure S12.** STEM-EDS comparison of PtNi<sub>1.22</sub>/HPCS before (bottom, green) and after (top, red) 60,000 ADT cycles.

## Reference:

1. M. Luo, Y. Sun, X. Zhang, Y. Qin, M. Li, Y. Li, C. Li, Y. Yang, L. Wang, P. Gao, G. Lu and S. Guo, *Adv. Mater.*, 2018, **30**, 1705515.
2. H. Kwon, M. K. Kabiraz, J. Park, A. Oh, H. Baik, S.-I. Choi and K. Lee, *Nano Lett.*, 2018, **18**, 2930-2936.
3. S. Chen, Z. Niu, C. Xie, M. Gao, M. Lai, M. Li and P. Yang, *ACS Nano*, 2018, **12**, 8697-8705.
4. K. Jiang, D. Zhao, S. Guo, X. Zhang, X. Zhu, J. Guo, G. Lu and X. Huang, *Sci. Adv.*, 2017, **3**, e1601705.
5. H. Huang, K. Li, Z. Chen, L. Luo, Y. Gu, D. Zhang, C. Ma, R. Si, J. Yang, Z. Peng and J. Zeng, *J. Am. Chem. Soc.*, 2017, **139**, 8152-8159.
6. N. Zhang, Y. Feng, X. Zhu, S. Guo, J. Guo and X. Huang, *Adv. Mater.*, 2017, **29**, 1603774.
7. L. Bu, S. Guo, X. Zhang, X. Shen, D. Su, G. Lu, X. Zhu, J. Yao, J. Guo and X. Huang, *Nat. Commun*, 2016, **7**, 11850.
8. M. Li, Z. Zhao, T. Cheng, A. Fortunelli, C.-Y. Chen, R. Yu, Q. Zhang, L. Gu, B. V. Merinov, Z. Lin, E. Zhu, T. Yu, Q. Jia, J. Guo, L. Zhang, W. A. Goddard, Y. Huang and X. Duan, *Science*, 2016, **354**, 1414-1419.
9. L. Bu, N. Zhang, S. Guo, X. Zhang, J. Li, J. Yao, T. Wu, G. Lu, J.-Y. Ma, D. Su and X. Huang, *Science*, 2016, **354**, 1410-1414.
10. X. Huang, Z. Zhao, L. Cao, Y. Chen, E. Zhu, Z. Lin, M. Li, A. Yan, A. Zettl, Y. M. Wang, X. Duan, T. Mueller and Y. Huang, *Science*, 2015, **348**, 1230-1234.
11. L. Zhang, L. T. Roling, X. Wang, M. Vara, M. Chi, J. Liu, S.-I. Choi, J. Park, J. A. Herron, Z. Xie, M. Mavrikakis and Y. Xia, *Science*, 2015, **349**, 412-416.
12. D. F. van der Vliet, C. Wang, D. Tripkovic, D. Strmcnik, X. F. Zhang, M. K. Debe, R. T. Atanasoski, N. M. Markovic and V. R. Stamenkovic, *Nat. Mater.*, 2012, **11**, 1051-1058.
13. Z. Huang, D. Raciti, S. Yu, L. Zhang, L. Deng, J. He, Y. Liu, N. M. Khashab, C. Wang, J. Gong and Z. Nie, *J. Am. Chem. Soc.*, 2016, **138**, 6332-6335.
14. D. He, L. Zhang, D. He, G. Zhou, Y. Lin, Z. Deng, X. Hong, Y. Wu, C. Chen and Y. Li, *Nat. Commun*, 2016, **7**, 12362.
15. D. S. He, D. He, J. Wang, Y. Lin, P. Yin, X. Hong, Y. Wu and Y. Li, *J. Am. Chem. Soc.*, 2016, **138**, 1494-1497.
16. X. Zhao, S. Takao, K. Higashi, T. Kaneko, G. Samjeskè, O. Sekizawa, T. Sakata, Y. Yoshida, T. Uruga and Y. Iwasawa, *ACS Catal.*, 2017, **7**, 4642-4654.
17. X. Tian, X. Zhao, Y.-Q. Su, L. Wang, H. Wang, D. Dang, B. Chi, H. Liu, E. J. M. Hensen, X. W. Lou and B. Y. Xia, *Science*, 2019, **366**, 850-856.
18. C. Galeano, J. C. Meier, M. Soorholtz, H. Bongard, C. Baldizzone, K. J. J. Mayrhofer and F. Schüth, *ACS Catal.*, 2014, **4**, 3856-3868.
19. J. Knossalla, P. Paciok, D. Göhl, D. Jalalpoor, E. Pizzutilo, A. M. Mingers, M. Heggen, R. E. Dunin-Borkowski, K. J. J. Mayrhofer, F. Schüth and M. Ledendecker, *J. Am. Chem. Soc.*, 2018, **140**, 15684-15689.
